# Supplementary material for: Automated volumetric radiomic analysis of breast cancer vascularization improves survival prediction in primary breast cancer
Source: PubMed Central journal article supplement (PMC7048934; doi:10.1038/s41598-020-60393-9), 2020-02-28
Supplement: 41598_2020_60393_MOESM1_ESM.pdf [file 41598_2020_60393_MOESM1_ESM.pdf]

## **Title Page**

# **Automated volumetric radiomic analysis of breast cancer vascularization improves survival prediction in primary breast cancer**

**Shortened title:** Automated radiomic analysis of breast cancer

### **Authors (first and last)**

Matthias Dietzel and Pascal A.T. Baltzer\*

### **Co authors**

Rüdiger Schulz-Wendtland

Stephan Ellmann

Ramy Zoubi,

Evelyn Wenkel,

Matthias Hammon

Paola Clauser,

Michael Uder,

Ingo B. Runnebaum

# Content

|                                                                 |    |
|-----------------------------------------------------------------|----|
| Content.....                                                    | 1  |
| Details on Patients and Methods .....                           | 2  |
| Assessment of clinicopathological factors (CPF) .....           | 2  |
| Treatment of patients .....                                     | 4  |
| Magnetic resonance imaging protocol.....                        | 6  |
| Univariate analysis: Detailed results .....                     | 7  |
| Clinicopathological factors .....                               | 7  |
| <b>T-Stage</b> .....                                            | 7  |
| <b>N-Stage</b> .....                                            | 9  |
| <b>Typing</b> .....                                             | 10 |
| <b>Additional DCIS</b> .....                                    | 11 |
| <b>Grading</b> .....                                            | 12 |
| <b>Estrogen receptors</b> .....                                 | 13 |
| <b>Progesteron receptors</b> .....                              | 14 |
| <b>HER2</b> .....                                               | 15 |
| Molecular subtypes .....                                        | 16 |
| <b>Luminal A and B (without her2 enriched subtype)</b> .....    | 16 |
| <b>Luminal B: her2 enriched subtype</b> .....                   | 17 |
| <b>Her2 enriched subtype</b> .....                              | 18 |
| <b>Basal like</b> .....                                         | 19 |
| <i>Breast MRI parameters</i> .....                              | 20 |
| VAV: vascularization of the most suspect tumor compartment..... | 20 |
| Volumetric analysis: Heterogeneity of vascularization .....     | 21 |
| Multivariate analysis: VAV.....                                 | 24 |
| References.....                                                 | 25 |

## Details on Patients and Methods

### ***Assessment of clinicopathological factors (CPF)***

*T-Stage:* Tumor resection was performed by a surgical gynaecologist. After formalin *fixation* the surgical specimen was examined by a breast pathologist: T-Stage (1 to 3) was assigned based on the largest diameter of the tumor as measured on representative slices. In case of chest wall/skin invasion or inflammatory cancer T-4 Stage was diagnosed <sup>1,2</sup>.

*N-Stage:* If lymph nodes were clinically or pathologically positive, axillary node dissection was carried out by a surgical gynaecologist. In all other cases, the sentinel method was standard of care. It was performed subsequent to subareolar injection of technetium 99m Sulfur Colloid and blue dye. The resulting surgical specimen were formalin *fixed and* evaluated by the pathologist: Hereby eight representative sections were chosen, paraffin-embedded and stained with haematoxylin and eosin (HE). Then, all sections were assessed with conventional microscopic examination. In case of unclear results, immunohistochemistry was performed using dedicated Pan-Cytokeratin antibodies (AE1/AE3, MNF-116). Finally, presence of metastatic deposits was staged according to the TNM system. Additionally, the numbers of resected and affected nodes were documented in the database <sup>1,2</sup>.

*Typing:* Following paraffin-embedding and *haematoxylin* staining of the surgical specimen, defined field areas of representative slices were examined. Based on standard histo-morphological criteria assessed with conventional light microscopy, tumors were dichotomized as “in situ disease” (basal membrane intact; exclusion criteria - see material and methods) or “invasive cancer” <sup>1,2</sup>. According to the WHO criteria invasive carcinomas were further classified as “ductal”, “lobular”, “mixed type” to name only the most common diagnoses. In case of doubt appropriate additional stainings were performed <sup>1</sup>.

*Grading* was done on defined field areas of representative HE stained slices. For grading, the percentage of tubule formation, the degree of nuclear pleomorphism and mitotic count within a given field of view are assessed. Based on the Elston-Ellis method it allows to morphologically assess the degree of tumor differentiation based on a three-stage qualitative score as Grade 1 to 3 (G1 to 3) <sup>3</sup>.

*Steroid receptors*: Immunohistochemical staining of estrogen (ER: Dako Monoclonal Mouse Anti Human Estrogen Receptor  $\alpha$  Clone 1D5) and progesterone receptors (PR: Dako Monoclonal Mouse Anti Human Progesterone Receptor Clone PgR 636) was performed adhering to a standardized protocol using formaldehyde-fixed, deparaffinised tissue sections. The percentage of positive cells was determined, resulting in a semi-quantitative measure for the ER and PR status <sup>2,4</sup>.

*Human epidermal growth factor receptor 2 (HER2)*: Based on deparaffinised tissue sections, immunohistochemical staining (Hercept Test<sup>TM</sup> for the Dako Autostainer Code K 5207) were conducted. Results were qualitatively rated on an ordinal score (0, 1+: positive, 2+, 3+: positive). Fluorescence in situ hybridization (FISH) tests were used to verify positive results of qualitative scores <sup>5</sup>.

## ***Treatment of patients***

Patients were managed according to applicable national guidelines and current evidence from clinical trials<sup>6,7</sup>. In the following, criteria of the guidelines are summarized and complemented by the number of patients fulfilling the given criteria:

Every patient received *surgical resection* of the primary tumor. Hereby local control of disease was primarily gained by breast conserving therapy. Modified radical mastectomy was the treatment of choice in patients with locally advanced breast cancer at time of initial diagnosis (n=22).

Primary method for *surgical axillary staging* was sentinel node biopsy. It was performed after preoperative sub-areolar injection of technetium 99m sulfur colloid and blue dye. If either the sentinel lymph node biopsy was positive or in case of already clinically positive nodes, axillary lymph node resection was performed (n= 100). Hereby at least 10 nodes in Level I or II were resected (median 22, range 10–44).

Following surgical treatment, patients were routinely scheduled for breast irradiation. The typical procedure after breast conserving therapy covered the whole ipsilateral breast and the chest wall. According to the guidelines, a total dose of 50 Gy was applied in a regimen of 5 × 2.0 Gy cycles per week. Similarly, in patients eligible for radical mastectomy (n=22), irradiation therapy was indicated; hereby the irradiation field covered the ipsilateral chest wall. Note that all of these patients also had a significant axillary tumor load with a median of 15 metastatic nodes (range 5–42).

As recommended by national guidelines, cytotoxic *chemotherapy* was considered according to the individual patient risk factors. According to the study design, no patient received *neoadjuvant systemic chemotherapy*. Applicable criteria were HER2-positive cancers (n=89), estrogen and/or progesterone negative cancers (n=43), nodal-positive disease (n= 100), high tumor grade (G3: n=189), or young age <35 years (n=3).

The 89 patients with HER2-positive cancers were treated with Trastuzumab according to the current evidence from clinical trials. Patients positive for estrogen and/or progesterone receptors received endocrine treatment after the completion of the chemotherapy normally over 5 years.

*Note: As the aim of this study was an interindividual comparison, the treatment regimen was not considered as a possible confounder. Therefore no more details on treatment were documented in the database.*

### ***Magnetic resonance imaging protocol***

Patients were placed in the prone position and a venous access was placed in a cubital vein. The DCE-MRI protocol consisted of repetitive radiofrequency spoiled dynamic T1-weighted gradient echo sequences (Fast Low Angle SHot, FLASH 2D), acquired at 1-minute intervals over eight minutes. After one baseline scan, Gadolinium pentetate (Magnevist, Bayer/Schering HealthCare, Leverkusen, Germany) was administered as a venous injection at a dosage of 0.2 ml/kg body weight, followed by a 20 ml saline flush. A constant flow rate of 3 ml/sec was ensured by using an automated injector (Spectris, Medrad, Pittsburgh, USA). Postcontrast scanning started 30 seconds after contrast material injection using the same adjustment settings. Acquisition parameters for DCE-MRI were 110ms (repetition time), 5ms (echo time), 80° (flip angle), 1.1\*0.9\*3mm<sup>3</sup> (spatial resolution) and 350 mm (field of view).

## Univariate analysis: Detailed results

### *Clinicopathological factors*

#### T-Stage

##### *Cox regression*

| Covariate | b      | SE     | Wald    | P       | Exp(b)  | 95% CI of Exp(b)  |
|-----------|--------|--------|---------|---------|---------|-------------------|
| T2        | 1,3517 | 0,3997 | 11,4330 | 0,0007  | 3,8639  | 1,7721 to 8,4248  |
| T3        | 2,2478 | 0,5933 | 14,3526 | 0,0002  | 9,4672  | 2,9768 to 30,1093 |
| T4        | 2,5216 | 0,5956 | 17,9255 | <0,0001 | 12,4491 | 3,8971 to 39,7675 |

Note: Reference category = T1



Cross tabs

| —       |                          | Survival |        | Total  |
|---------|--------------------------|----------|--------|--------|
|         |                          | DSS      | DSD    |        |
| T-Stage | Count                    | 26       | 1      | 27     |
|         | % within T-Stage         | 96,3%    | 3,7%   | 100,0% |
| T1a     | <b>% within Survival</b> | 9,3%     | 2,9%   | 8,6%   |
|         | % of Total               | 8,3%     | ,3%    | 8,6%   |
|         | Count                    | 43       | 3      | 46     |
| T1b     | % within T-Stage         | 93,5%    | 6,5%   | 100,0% |
|         | <b>% within Survival</b> | 15,4%    | 8,6%   | 14,6%  |
|         | % of Total               | 13,7%    | 1,0%   | 14,6%  |
| T1c     | Count                    | 117      | 6      | 123    |
|         | % within T-Stage         | 95,1%    | 4,9%   | 100,0% |
|         | <b>% within Survival</b> | 41,9%    | 17,1%  | 39,2%  |
| T2      | % of Total               | 37,3%    | 1,9%   | 39,2%  |
|         | Count                    | 80       | 17     | 97     |
|         | % within T-Stage         | 82,5%    | 17,5%  | 100,0% |
| T3      | <b>% within Survival</b> | 28,7%    | 48,6%  | 30,9%  |
|         | % of Total               | 25,5%    | 5,4%   | 30,9%  |
|         | Count                    | 7        | 4      | 11     |
| T4      | % within T-Stage         | 63,6%    | 36,4%  | 100,0% |
|         | <b>% within Survival</b> | 2,5%     | 11,4%  | 3,5%   |
|         | % of Total               | 2,2%     | 1,3%   | 3,5%   |
| Total   | Count                    | 6        | 4      | 10     |
|         | % within T-Stage         | 60,0%    | 40,0%  | 100,0% |
|         | <b>% within Survival</b> | 2,2%     | 11,4%  | 3,2%   |
|         | % of Total               | 1,9%     | 1,3%   | 3,2%   |
|         | Count                    | 279      | 35     | 314    |
|         | % within T-Stage         | 88,9%    | 11,1%  | 100,0% |
|         | % within Survival        | 100,0%   | 100,0% | 100,0% |
|         | % of Total               | 88,9%    | 11,1%  | 100,0% |

## N-Stage

### Cross tabs

|         |                   |                          | Survival |        | Total  |
|---------|-------------------|--------------------------|----------|--------|--------|
|         |                   |                          | DSS      | DSD    |        |
| N-Stage | N0                | Count                    | 206      | 14     | 220    |
|         |                   | % within N-Stage         | 93,6%    | 6,4%   | 100,0% |
|         |                   | <b>% within Survival</b> | 73,8%    | 40,0%  | 70,1%  |
|         |                   | % of Total               | 65,6%    | 4,5%   | 70,1%  |
|         | N1                | Count                    | 69       | 19     | 88     |
|         |                   | % within N-Stage         | 78,4%    | 21,6%  | 100,0% |
|         |                   | <b>% within Survival</b> | 24,7%    | 54,3%  | 28,0%  |
|         |                   | % of Total               | 22,0%    | 6,1%   | 28,0%  |
|         | N2                | Count                    | 4        | 2      | 6      |
|         |                   | % within N-Stage         | 66,7%    | 33,3%  | 100,0% |
|         |                   | <b>% within Survival</b> | 1,4%     | 5,7%   | 1,9%   |
|         |                   | % of Total               | 1,3%     | ,6%    | 1,9%   |
| Total   | Count             | 279                      | 35       | 314    |        |
|         | % within N-Stage  | 88,9%                    | 11,1%    | 100,0% |        |
|         | % within Survival | 100,0%                   | 100,0%   | 100,0% |        |
|         | % of Total        | 88,9%                    | 11,1%    | 100,0% |        |

### Cox regression

| Covariate     | b      | SE     | Wald    | P      | Exp(b) | 95% CI of Exp(b)  |
|---------------|--------|--------|---------|--------|--------|-------------------|
| Nodal_Stage=1 | 1,3237 | 0,3526 | 14,0925 | 0,0002 | 3,7575 | 1,8892 to 7,4735  |
| Nodal_Stage=2 | 1,7442 | 0,7571 | 5,3080  | 0,0212 | 5,7215 | 1,3073 to 25,0412 |

Note: Reference category = N0

## Typing

### Cross tabs

|                   |                                     |                          | Survival |        | Total  |
|-------------------|-------------------------------------|--------------------------|----------|--------|--------|
|                   |                                     |                          | DSS      | DSD    |        |
| Typing            | Invasive ductal                     | Count                    | 212      | 27     | 239    |
|                   |                                     | % within Typing          | 88,7%    | 11,3%  | 100,0% |
|                   |                                     | <b>% within Survival</b> | 76,0%    | 77,1%  | 76,1%  |
|                   |                                     | % of Total               | 67,5%    | 8,6%   | 76,1%  |
|                   | Invasive lobular                    | Count                    | 23       | 4      | 27     |
|                   |                                     | % within Typing          | 85,2%    | 14,8%  | 100,0% |
|                   |                                     | <b>% within Survival</b> | 8,2%     | 11,4%  | 8,6%   |
|                   |                                     | % of Total               | 7,3%     | 1,3%   | 8,6%   |
|                   | Mixed (Invasive lobular and ductal) | Count                    | 38       | 4      | 42     |
|                   |                                     | % within Typing          | 90,5%    | 9,5%   | 100,0% |
|                   |                                     | <b>% within Survival</b> | 13,6%    | 11,4%  | 13,4%  |
|                   |                                     | % of Total               | 12,1%    | 1,3%   | 13,4%  |
|                   | Invasive medullary                  | Count                    | 3        | 0      | 3      |
|                   |                                     | % within Typing          | 100,0%   | ,0%    | 100,0% |
|                   |                                     | <b>% within Survival</b> | 1,1%     | ,0%    | 1,0%   |
| % of Total        |                                     | 1,0%                     | ,0%      | 1,0%   |        |
| Invasive mucinous | Count                               | 3                        | 0        | 3      |        |
|                   | % within Typing                     | 100,0%                   | ,0%      | 100,0% |        |
|                   | <b>% within Survival</b>            | 1,1%                     | ,0%      | 1,0%   |        |
|                   | % of Total                          | 1,0%                     | ,0%      | 1,0%   |        |
| Total             | Count                               | 279                      | 35       | 314    |        |
|                   | % within Typing                     | 88,9%                    | 11,1%    | 100,0% |        |
|                   | <b>% within Survival</b>            | 100,0%                   | 100,0%   | 100,0% |        |
|                   | % of Total                          | 88,9%                    | 11,1%    | 100,0% |        |

### Cox regression

| Covariate                           | b            | SE       | Wald     | P      | Exp(b) | 95% CI of Exp(b)       |
|-------------------------------------|--------------|----------|----------|--------|--------|------------------------|
| Invasive lobular                    | 0,1545       | 0,5375   | 0,08267  | 0,7737 | 1,1671 | 0,4092 to 3,3287       |
| Mixed (Invasive lobular and ductal) | -<br>0,03527 | 0,5370   | 0,004313 | 0,9476 | 0,9653 | 0,3388 to 2,7507       |
| Invasive medullary                  | -<br>11,5137 | 337,8354 | 0,001162 | 0,9728 | 0,0000 | 0,0000 to<br>127E+279  |
| Invasive mucinous                   | -<br>11,5125 | 305,6286 | 0,001419 | 0,9700 | 0,0000 | 0,0000 to<br>67,5E+252 |

Note: Reference category = Invasive ductal

## Additional DCIS

### Cross tabs

|                          |            |                          | Survival |        | Total  |
|--------------------------|------------|--------------------------|----------|--------|--------|
|                          |            |                          | DSS      | DSD    |        |
| Additional DCIS          | absent     | Count                    | 171      | 22     | 193    |
|                          |            | % within Additional DCIS | 88,6%    | 11,4%  | 100,0% |
|                          |            | <b>% within Survival</b> | 61,3%    | 62,9%  | 61,5%  |
|                          |            | % of Total               | 54,5%    | 7,0%   | 61,5%  |
|                          | present    | Count                    | 108      | 13     | 121    |
|                          |            | % within Additional DCIS | 89,3%    | 10,7%  | 100,0% |
| <b>% within Survival</b> |            | 38,7%                    | 37,1%    | 38,5%  |        |
|                          | % of Total | 34,4%                    | 4,1%     | 38,5%  |        |
| Total                    |            | Count                    | 279      | 35     | 314    |
|                          |            | % within Additional DCIS | 88,9%    | 11,1%  | 100,0% |
|                          |            | % within Survival        | 100,0%   | 100,0% | 100,0% |
|                          |            | % of Total               | 88,9%    | 11,1%  | 100,0% |

### Cox regression

| Covariate     | b       | SE     | Wald   | P      | Exp(b) | 95% CI of Exp(b) |
|---------------|---------|--------|--------|--------|--------|------------------|
| DCIS= present | -0,1199 | 0,3503 | 0,1172 | 0,7321 | 0,8870 | 0,4480 to 1,7563 |

## Grading

### Cross tabs

|         |                   |                          | Survival |        | Total  |
|---------|-------------------|--------------------------|----------|--------|--------|
|         |                   |                          | DSS      | DSD    |        |
| Grading | G1                | Count                    | 12       | 0      | 12     |
|         |                   | % within Grading         | 100,0%   | ,0%    | 100,0% |
|         |                   | <b>% within Survival</b> | 4,3%     | ,0%    | 3,8%   |
|         |                   | % of Total               | 3,8%     | ,0%    | 3,8%   |
|         | G2                | Count                    | 108      | 13     | 121    |
|         |                   | % within Grading         | 89,3%    | 10,7%  | 100,0% |
|         |                   | <b>% within Survival</b> | 38,7%    | 37,1%  | 38,5%  |
|         |                   | % of Total               | 34,4%    | 4,1%   | 38,5%  |
|         | G3                | Count                    | 159      | 22     | 181    |
|         |                   | % within Grading         | 87,8%    | 12,2%  | 100,0% |
|         |                   | <b>% within Survival</b> | 57,0%    | 62,9%  | 57,6%  |
|         |                   | % of Total               | 50,6%    | 7,0%   | 57,6%  |
| Total   | Count             | 279                      | 35       | 314    |        |
|         | % within Grading  | 88,9%                    | 11,1%    | 100,0% |        |
|         | % within Survival | 100,0%                   | 100,0%   | 100,0% |        |
|         | % of Total        | 88,9%                    | 11,1%    | 100,0% |        |

### Cox regression

| Co-vari-ate | b       | SE       | Wald     | P      | Exp(b)      | 95% CI of Exp(b)   |
|-------------|---------|----------|----------|--------|-------------|--------------------|
| G2          | 12,4636 | 240,9781 | 0,002675 | 0,9588 | 258739,1467 | 0,0000 to 310E+207 |
| G3          | 12,6414 | 240,9780 | 0,002752 | 0,9582 | 309100,3403 | 0,0000 to 370E+207 |

Note: Reference category =G1

## Estrogen receptors

### Cross tabs

|                          |                             |                             | Survival |        | Total  |
|--------------------------|-----------------------------|-----------------------------|----------|--------|--------|
|                          |                             |                             | DSS      | DSD    | DSS    |
| estrogen receptors       | negative                    | Count                       | 40       | 12     | 52     |
|                          |                             | % within estrogen receptors | 76,9%    | 23,1%  | 100,0% |
|                          |                             | <b>% within survival</b>    | 14,3%    | 34,3%  | 16,6%  |
|                          |                             | % of Total                  | 12,7%    | 3,8%   | 16,6%  |
|                          | positive                    | Count                       | 239      | 23     | 262    |
|                          |                             | % within estrogen receptors | 91,2%    | 8,8%   | 100,0% |
| <b>% within survival</b> |                             | 85,7%                       | 65,7%    | 83,4%  |        |
| Total                    |                             | % of Total                  | 76,1%    | 7,3%   | 83,4%  |
|                          | Count                       | 279                         | 35       | 314    |        |
|                          | % within estrogen receptors | 88,9%                       | 11,1%    | 100,0% |        |
|                          | % within survival           | 100,0%                      | 100,0%   | 100,0% |        |
|                          | % of Total                  | 88,9%                       | 11,1%    | 100,0% |        |

### Cox regression

| Covariate                    | b       | SE     | Wald   | P      | Exp(b) | 95% CI of Exp(b) |
|------------------------------|---------|--------|--------|--------|--------|------------------|
| estrogen receptors: positive | -1,0622 | 0,3565 | 8,8787 | 0,0029 | 0,3457 | 0,1725 to 0,6928 |

## Progesteron receptors

### Cross tabs

|                        |          |                                 | Survival |        | Total  |
|------------------------|----------|---------------------------------|----------|--------|--------|
|                        |          |                                 | DSS      | DSD    | DSS    |
| progesterone receptors | negative | Count                           | 45       | 12     | 57     |
|                        |          | % within progesterone receptors | 78,9%    | 21,1%  | 100,0% |
|                        |          | <b>% within survival</b>        | 16,1%    | 34,3%  | 18,2%  |
|                        |          | % of Total                      | 14,3%    | 3,8%   | 18,2%  |
|                        | positive | Count                           | 234      | 23     | 257    |
|                        |          | % within progesterone receptors | 91,1%    | 8,9%   | 100,0% |
|                        |          | <b>% within survival</b>        | 83,9%    | 65,7%  | 81,8%  |
|                        |          | % of Total                      | 74,5%    | 7,3%   | 81,8%  |
| Total                  |          | Count                           | 279      | 35     | 314    |
|                        |          | % within progesterone receptors | 88,9%    | 11,1%  | 100,0% |
|                        |          | <b>% within survival</b>        | 100,0%   | 100,0% | 100,0% |
|                        |          | % of Total                      | 88,9%    | 11,1%  | 100,0% |

### Cox regression

| Covariate                        | b       | SE     | Wald   | P      | Exp(b) | 95% CI of Exp(b) |
|----------------------------------|---------|--------|--------|--------|--------|------------------|
| Progesterone receptors: positive | -0,8314 | 0,3565 | 5,4404 | 0,0197 | 0,4354 | 0,2165 to 0,8757 |

## HER2

### Cross tabs

|               |                          |  | Survival |        | Total  |
|---------------|--------------------------|--|----------|--------|--------|
|               |                          |  | DSS      | DSD    | DSS    |
| HER2 negative | Count                    |  | 140      | 13     | 153    |
|               | % within HER2            |  | 91,5%    | 8,5%   | 100,0% |
|               | <b>% within survival</b> |  | 50,2%    | 37,1%  | 48,7%  |
|               | % of Total               |  | 44,6%    | 4,1%   | 48,7%  |
| positive      | Count                    |  | 139      | 22     | 161    |
|               | % within HER2            |  | 86,3%    | 13,7%  | 100,0% |
|               | <b>% within survival</b> |  | 49,8%    | 62,9%  | 51,3%  |
|               | % of Total               |  | 44,3%    | 7,0%   | 51,3%  |
| Total         | Count                    |  | 279      | 35     | 314    |
|               | % within HER2            |  | 88,9%    | 11,1%  | 100,0% |
|               | % within survival        |  | 100,0%   | 100,0% | 100,0% |
|               | % of Total               |  | 88,9%    | 11,1%  | 100,0% |

### Cox regression

| Covariate      | b      | SE     | Wald   | P      | Exp(b) | 95% CI of Exp(b) |
|----------------|--------|--------|--------|--------|--------|------------------|
| HER2: positive | 0,4622 | 0,3499 | 1,7451 | 0,1865 | 1,5875 | 0,7997 to 3,1517 |



## Molecular subtypes

### Luminal A and B (without her2 enriched subtype)

#### Cross tabs

|                 |     |                          | Survival |        | Total  |
|-----------------|-----|--------------------------|----------|--------|--------|
|                 |     |                          | DSS      | DSD    | DSS    |
| Luminal A and B | no  | Count                    | 152      | 26     | 178    |
|                 |     | % within Luminal A and B | 85,4%    | 14,6%  | 100,0% |
|                 |     | <b>% within survival</b> | 54,5%    | 74,3%  | 56,7%  |
|                 |     | % of Total               | 48,4%    | 8,3%   | 56,7%  |
|                 | yes | Count                    | 127      | 9      | 136    |
|                 |     | % within Luminal A and B | 93,4%    | 6,6%   | 100,0% |
|                 |     | <b>% within survival</b> | 45,5%    | 25,7%  | 43,3%  |
|                 |     | % of Total               | 40,4%    | 2,9%   | 43,3%  |
| Total           |     | Count                    | 279      | 35     | 314    |
|                 |     | % within Luminal A and B | 88,9%    | 11,1%  | 100,0% |
|                 |     | % within survival        | 100,0%   | 100,0% | 100,0% |
|                 |     | % of Total               | 88,9%    | 11,1%  | 100,0% |

#### Cox regression

| Covariate       | b       | SE     | Wald   | P      | Exp(b) | 95% CI of Exp(b) |
|-----------------|---------|--------|--------|--------|--------|------------------|
| Luminal A and B | -0,7825 | 0,3867 | 4,0933 | 0,0431 | 0,4573 | 0,2143 to 0,9759 |

## Luminal B: her2 enriched subtype

### Cross tabs

|                                  |                                           |                                           | Survival |        | Total  |
|----------------------------------|-------------------------------------------|-------------------------------------------|----------|--------|--------|
|                                  |                                           |                                           | DSS      | DSD    | DSS    |
| Luminal B: her2 enriched subtype | no                                        | Count                                     | 153      | 17     | 170    |
|                                  |                                           | % within Luminal B: her2 enriched subtype | 90,0%    | 10,0%  | 100,0% |
|                                  |                                           | <b>% within survival</b>                  | 54,8%    | 48,6%  | 54,1%  |
|                                  |                                           | % of Total                                | 48,7%    | 5,4%   | 54,1%  |
|                                  | yes                                       | Count                                     | 126      | 18     | 144    |
|                                  |                                           | % within Luminal B: her2 enriched subtype | 87,5%    | 12,5%  | 100,0% |
|                                  |                                           | <b>% within survival</b>                  | 45,2%    | 51,4%  | 45,9%  |
|                                  |                                           | % of Total                                | 40,1%    | 5,7%   | 45,9%  |
| Total                            | Count                                     | 279                                       | 35       | 314    |        |
|                                  | % within Luminal B: her2 enriched subtype | 88,9%                                     | 11,1%    | 100,0% |        |
|                                  | % within survival                         | 100,0%                                    | 100,0%   | 100,0% |        |
|                                  | % of Total                                | 88,9%                                     | 11,1%    | 100,0% |        |

### Cox regression

| Covariate                        | b      | SE     | Wald   | P      | Exp(b) | 95% CI of Exp(b) |
|----------------------------------|--------|--------|--------|--------|--------|------------------|
| Luminal B: her2 enriched subtype | 0,1852 | 0,3382 | 0,2997 | 0,5841 | 1,2034 | 0,6223 to 2,3273 |

## Her2 enriched subtype

### Cross tabs

|                          |                        |                          | Survival |        | Total  |
|--------------------------|------------------------|--------------------------|----------|--------|--------|
|                          |                        |                          | DSS      | DSD    | DSS    |
| HER2_enriched            | no                     | Count                    | 266      | 31     | 297    |
|                          |                        | % within HER2_enriched   | 89,6%    | 10,4%  | 100,0% |
|                          |                        | <b>% within survival</b> | 95,3%    | 88,6%  | 94,6%  |
|                          |                        | % of Total               | 84,7%    | 9,9%   | 94,6%  |
|                          | yes                    | Count                    | 13       | 4      | 17     |
|                          |                        | % within HER2_enriched   | 76,5%    | 23,5%  | 100,0% |
| <b>% within survival</b> |                        | 4,7%                     | 11,4%    | 5,4%   |        |
|                          | % of Total             | 4,1%                     | 1,3%     | 5,4%   |        |
| Total                    | Count                  | 279                      | 35       | 314    |        |
|                          | % within HER2_enriched | 88,9%                    | 11,1%    | 100,0% |        |
|                          | % within survival      | 100,0%                   | 100,0%   | 100,0% |        |
|                          | % of Total             | 88,9%                    | 11,1%    | 100,0% |        |

### Cox regression

| Covariate     | b      | SE     | Wald   | P      | Exp(b) | 95% CI of Exp(b) |
|---------------|--------|--------|--------|--------|--------|------------------|
| HER2 enriched | 0,9436 | 0,5327 | 3,1379 | 0,0765 | 2,5691 | 0,9093 to 7,2591 |

## Basal like

### Cross tabs

|            |       |                          | Survival |        | Total  |
|------------|-------|--------------------------|----------|--------|--------|
|            |       |                          | DSS      | DSD    | DSS    |
| basal like | no    | Count                    | 266      | 31     | 297    |
|            |       | % within basal like      | 89,6%    | 10,4%  | 100,0% |
|            |       | <b>% within survival</b> | 95,3%    | 88,6%  | 94,6%  |
|            |       | % of Total               | 84,7%    | 9,9%   | 94,6%  |
| yes        | yes   | Count                    | 13       | 4      | 17     |
|            |       | % within basal like      | 76,5%    | 23,5%  | 100,0% |
|            |       | <b>% within survival</b> | 4,7%     | 11,4%  | 5,4%   |
|            |       | % of Total               | 4,1%     | 1,3%   | 5,4%   |
| Total      | Total | Count                    | 279      | 35     | 314    |
|            |       | % within basal like      | 88,9%    | 11,1%  | 100,0% |
|            |       | % within survival        | 100,0%   | 100,0% | 100,0% |
|            |       | % of Total               | 88,9%    | 11,1%  | 100,0% |

### Cox regression

| Covariate  | b      | SE     | Wald   | P      | Exp(b) | 95% CI of Exp(b) |
|------------|--------|--------|--------|--------|--------|------------------|
| basal like | 0,8319 | 0,5315 | 2,4502 | 0,1175 | 2,2977 | 0,8151 to 6,4770 |

## Breast MRI parameters

### VAV: vascularization of the most suspect tumor compartment

#### Cross tabs

| Parameter        | Subgroup | Mean  | SD   | Range |     |
|------------------|----------|-------|------|-------|-----|
| Peak enhancement | all      | 111.5 | 44.7 | 31    | 354 |
|                  | DSS      | 110.0 | 44.5 | 31    | 354 |
|                  | DSD      | 123.5 | 44.7 | 43    | 228 |
| TTP              | all      | 1.4   | 0.8  | 1     | 6   |
|                  | DSS      | 1.3   | 0.7  | 1     | 4   |
|                  | DSD      | 1.7   | 1.2  | 1     | 6   |
| Wash-in          | all      | 108.5 | 43.2 | 19    | 291 |
|                  | DSS      | 107.1 | 43.1 | 19    | 291 |
|                  | DSD      | 119.6 | 43.1 | 36    | 224 |
| Wash-out         | all      | 39.4  | 23.3 | -22   | 177 |
|                  | DSS      | 39.0  | 22.5 | -11   | 177 |
|                  | DSD      | 42.5  | 28.9 | -22   | 121 |
| Washout ratio    | all      | 2.5   | 4.9  | 0.9   | 70  |
|                  | DSS      | 2.6   | 5.2  | 0.9   | 70  |
|                  | DSD      | 2.1   | 1.7  | 0.9   | 9   |

#### Cox regression

| Covariate        | b     | SE   | Wald | P     | Exp(b) | 95% CI of Exp(b) |
|------------------|-------|------|------|-------|--------|------------------|
| peak enhancement | 0.01  | 0.00 | 3.27 | 0.07  | 1.01   | 0.9995 to 1.0129 |
| TTP              | 0.48  | 0.16 | 8.91 | 0.003 | 1.61   | 1.1783 to 2.2076 |
| Wash-in          | 0.01  | 0.00 | 3.03 | 0.08  | 1.01   | 0.9992 to 1.0138 |
| Wash-out         | 0.00  | 0.01 | 0.57 | 0.45  | 1.01   | 0.9920 to 1.0181 |
| Washout ratio    | -0.04 | 0.07 | 0.36 | 0.55  | 0.96   | 0.8268 to 1.1066 |

## **Volumetric analysis: Heterogeneity of vascularization**

*Cross tabs*

| Parameter                           | Subgroup | Mean | SD   | Range |       |
|-------------------------------------|----------|------|------|-------|-------|
|                                     |          |      |      |       |       |
| Fast wash-in and persistent         | all      | 2.8  | 5.0  | 0     | 68    |
|                                     | DSS      | 2.7  | 5.2  | 0     | 68    |
|                                     | DSD      | 3.8  | 3.8  | 0     | 16    |
| Intermediate wash-in and persistent | all      | 23.3 | 10.3 | 0     | 57.1  |
|                                     | DSS      | 23.4 | 10.4 | 0     | 57.1  |
|                                     | DSD      | 22.5 | 9.8  | 4.2   | 40.9  |
| Weak wash-in and persistent         | all      | 28.6 | 13.7 | 2.4   | 80    |
|                                     | DSS      | 29.3 | 14.1 | 2.4   | 80    |
|                                     | DSD      | 23.0 | 8.6  | 5.4   | 45.3  |
| Fast wash-in and plateau            | all      | 3.7  | 3.8  | 0     | 26.6  |
|                                     | DSS      | 3.7  | 3.9  | 0     | 26.6  |
|                                     | DSD      | 3.9  | 2.8  | 0     | 10.9  |
| Intermediate wash-in and plateau    | all      | 9.7  | 4.4  | 0     | 26.2  |
|                                     | DSS      | 9.6  | 4.6  | 0     | 26.2  |
|                                     | DSD      | 10.1 | 3.0  | 3.7   | 16    |
| Weak wash-in and plateau            | all      | 5.0  | 3.9  | 0     | 44.3  |
|                                     | DSS      | 5.0  | 4.0  | 0     | 44.3  |
|                                     | DSD      | 4.4  | 2.5  | 1.6   | 12.4  |
| Total tumor volume                  | all      | 9.7  | 29.1 | 0.1   | 313.1 |
|                                     | DSS      | 7.1  | 21.1 | 0.1   | 313.1 |
|                                     | DSD      | 29.9 | 60.4 | 0.5   | 249.7 |
| Fast wash-in and wash-out           | all      | 7.7  | 8.6  | 0     | 43.9  |
|                                     | DSS      | 7.6  | 8.8  | 0     | 43.9  |
|                                     | DSD      | 8.2  | 6.7  | 0     | 24.3  |
| Intermediate wash-in and wash-out   | all      | 12.1 | 9.6  | 0     | 55.7  |
|                                     | DSS      | 11.7 | 9.3  | 0     | 41.5  |
|                                     | DSD      | 16.0 | 11.2 | 2.5   | 55.7  |

| Parameter                 | Subgroup | Mean | SD  | Range |    |
|---------------------------|----------|------|-----|-------|----|
|                           |          |      |     |       |    |
| Weak wash-in and wash-out | all      | 7.4  | 6.6 | 0     | 45 |
|                           | DSS      | 7.2  | 6.4 | 0     | 41 |
|                           | DSD      | 8.7  | 7.4 | 2     | 45 |

### Cox regression

| Covariate                           | b     | SE   | Wald  | P       | Exp(b) | 95% CI of Exp(b) |
|-------------------------------------|-------|------|-------|---------|--------|------------------|
| Fast wash-in and persistent         | 0.02  | 0.02 | 1.38  | 0.24    | 1.02   | 0.9853 to 1.0609 |
| Intermediate wash-in and persistent | -0.01 | 0.02 | 0.41  | 0.52    | 0.99   | 0.9578 to 1.0221 |
| Weak wash-in and persistent         | -0.04 | 0.01 | 7.57  | 0.006   | 0.96   | 0.9321 to 0.9883 |
| Fast wash-in and plateau            | 0.01  | 0.04 | 0.11  | 0.74    | 1.01   | 0.9358 to 1.0982 |
| Intermediate wash-in and plateau    | 0.03  | 0.04 | 0.62  | 0.43    | 1.03   | 0.9568 to 1.1086 |
| Weak wash-in and plateau            | -0.04 | 0.05 | 0.60  | 0.44    | 0.96   | 0.8613 to 1.0671 |
| Total tumor volume                  | 0.01  | 0.00 | 23.64 | <0.0001 | 1.01   | 1.0066 to 1.0155 |
| Fast wash-in and wash-out           | 0.01  | 0.02 | 0.28  | 0.60    | 1.01   | 0.9739 to 1.0468 |
| Intermediate wash-in and wash-out   | 0.04  | 0.01 | 7.02  | 0.008   | 1.04   | 1.0103 to 1.0713 |
| Weak wash-in and wash-out           | 0.03  | 0.02 | 1.46  | 0.23    | 1.03   | 0.9845 to 1.0681 |



## Multivariate analysis: VAV

| Covariate                      | b     | SE   | P       | Hazard Ratio | 95% CI       |
|--------------------------------|-------|------|---------|--------------|--------------|
| Time-to-peak enhancement (TTP) | 0,70  | 0,16 | <0,0001 | 2,02         | 1,47 to 2,78 |
| Total tumor volume (TTV)       | 0,01  | 0,00 | <0,0001 | 1,01         | 1,01 to 1,01 |
| Persistent and weak wash-in    | -0,06 | 0,02 | 0,0007  | 0,95         | 0,92 to 0,98 |

## References

1. Edge, S., Byrd, D., Carducci, M. & Wittekind, C. *TNM Classification of Malignant Tumours*. (Springer, 2009).
2. Fattaneh, A. & Tavassoli, P. Tumours of the breast. in *World Health Organization Classification of Tumours. Pathology and Genetics. Tumours of the Breast and Female Genital Organs* 9–112 (IARC Press, 2003).
3. Elston, C. W. & Ellis, I. O. Pathological prognostic factors in breast cancer. I. The value of histological grade in breast cancer: experience from a large study with long-term follow-up. *Histopathology* **19**, 403–410 (1991).
4. Citation blinded for review process.
5. Wolff, A. C. *et al.* American Society of Clinical Oncology/College of American Pathologists guideline recommendations for human epidermal growth factor receptor 2 testing in breast cancer. *Arch. Pathol. Lab. Med.* **131**, 18–43 (2007).
6. Kreienberg, R., Kopp, I. & Lorenz, W. *Diagnostik, Therapie und Nachsorge des Mammakarzinoms der Frau S3 Leitlinie*. (Informationszentrum für Standards in der Onkologie (ISTO), 2004).
7. Deutsche Krebsgesellschaft e.V. (DKG), und Deutsche Gesellschaft für Gynäkologie und & Geburtshilfe (DGGG). *Interdisziplinäre S3-Leitlinie für die Diagnostik, Therapie und Nachsorge des Mammakarzinoms. Aktualisierung 2008*. (Zuckschwerdt Verlag, 2008).
